# Supplementary material for: Plasmolysis-inspired yolk–shell hydrogel-core@void@MXene-shell microspheres with strong electromagnetic interference shielding performance
Source: Royal Society of Chemistry journal article supplement (doi:10.1039/d1ta08788f), 2021-01-01
Supplement: d1ta08788f1.pdf [file d1ta08788f1.pdf]

## Supporting Information

### **Plasmolysis-inspired      Yolk-Shell      Hydrogel-core@Void@MXene-shell** **Microspheres with Strong Electromagnetic Interference Shielding Performance**

Chenxi Li,<sup>a</sup> Xingxing Ni,<sup>a</sup> Yang Lei,<sup>a</sup> Shangyang Li,<sup>b</sup> Lei Jin,<sup>c</sup> Bo You<sup>a\*</sup>

<sup>a</sup>Department of Materials Science, Advanced Coatings Research Center of Ministry of Education of China, Fudan University, Shanghai 200433, People's Republic of China.

<sup>b</sup>Key Laboratory for Information Science of Electromagnetic Waves, Fudan University, Shanghai 200433, People's Republic of China.

<sup>c</sup>Aviation Key Laboratory of Science and Technology on Advanced Surface Engineering, AVIC Manufacturing Technology Institute, Beijing, 100024, China

**\*Corresponding Authors:**

E-mail: youbo@fudan.edu.cn.

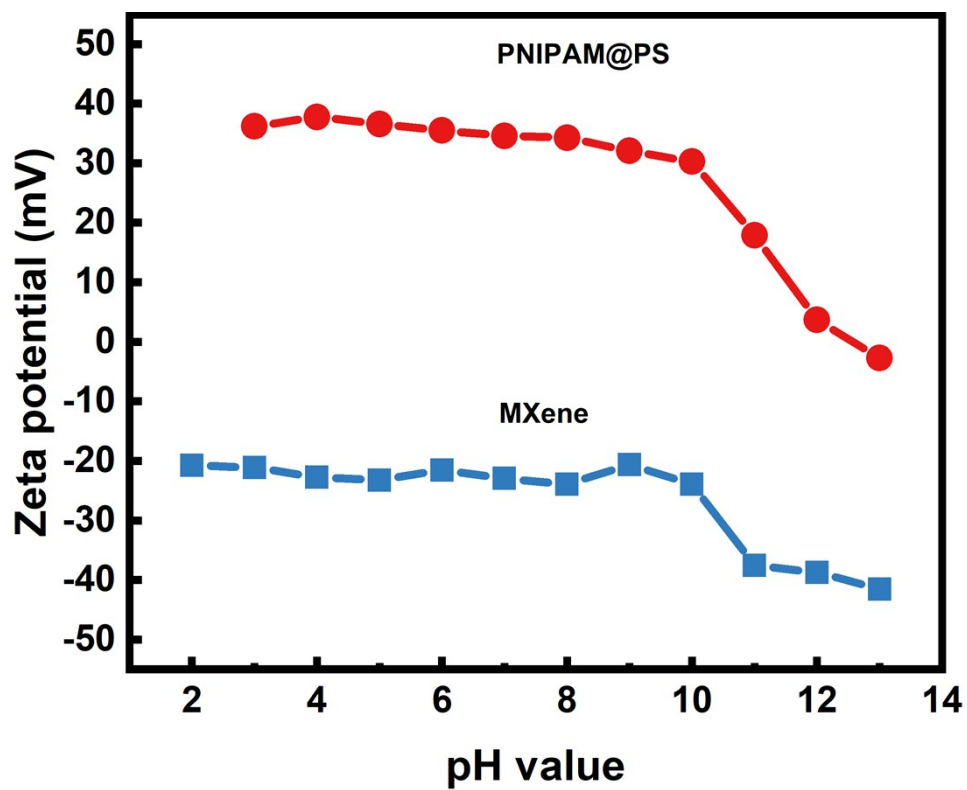

Figure S1. Zeta potentials of positively charged PNIPAM@PS microspheres and negatively charged MXene nanosheets

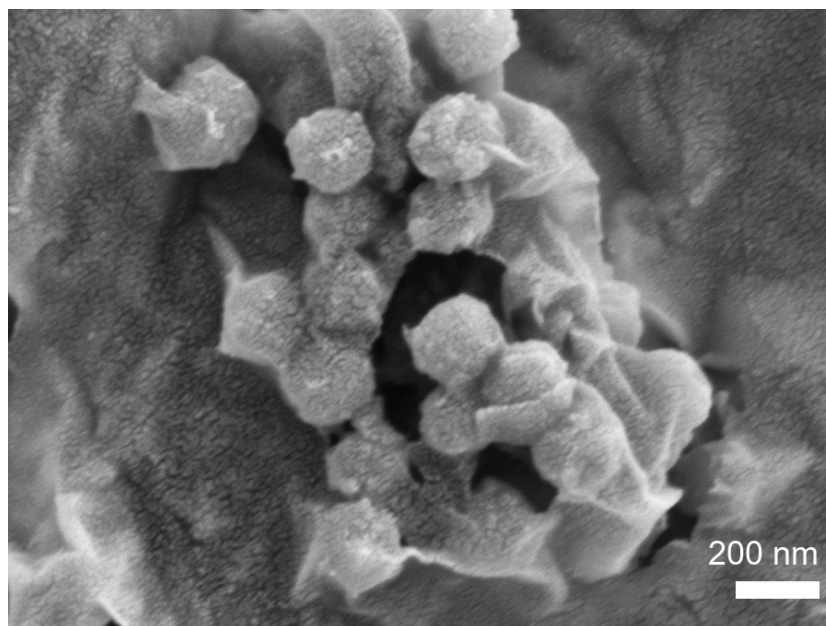

Figure S2. SEM images of film with 1:2 mass ratio of PNIPAM@void@PS and  $Ti_3C_2T_x$ .

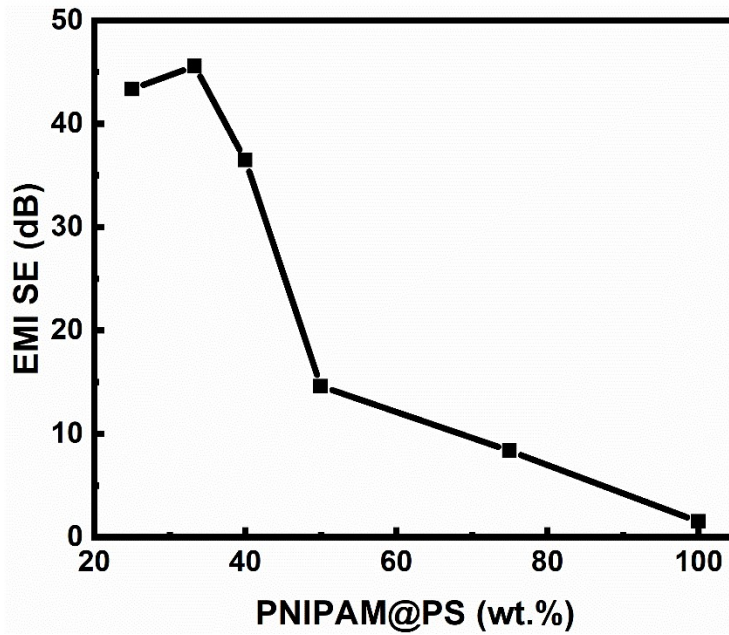

Figure S3. Maximum EMI SE value of PNIPAM@void@PS@Ti<sub>3</sub>C<sub>2</sub>T<sub>x</sub> films in X-band (8.2 GHz -12.4 GHz). Variation of Maximum EMI SE upon increasing the content of PNIPAM@PS microspheres in X-band.

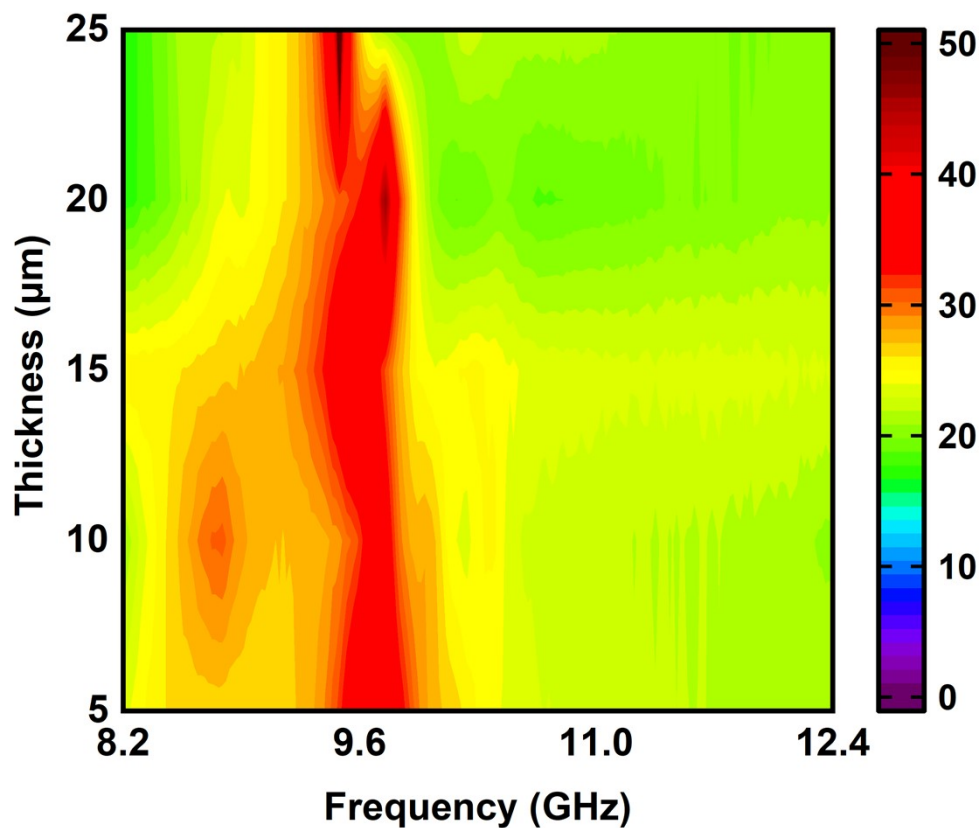

Figure S4. Plot of the SE<sub>a</sub> of the films based on yolk-shell PNIPAM@void@PS@Ti<sub>3</sub>C<sub>2</sub>T<sub>x</sub> microspheres.

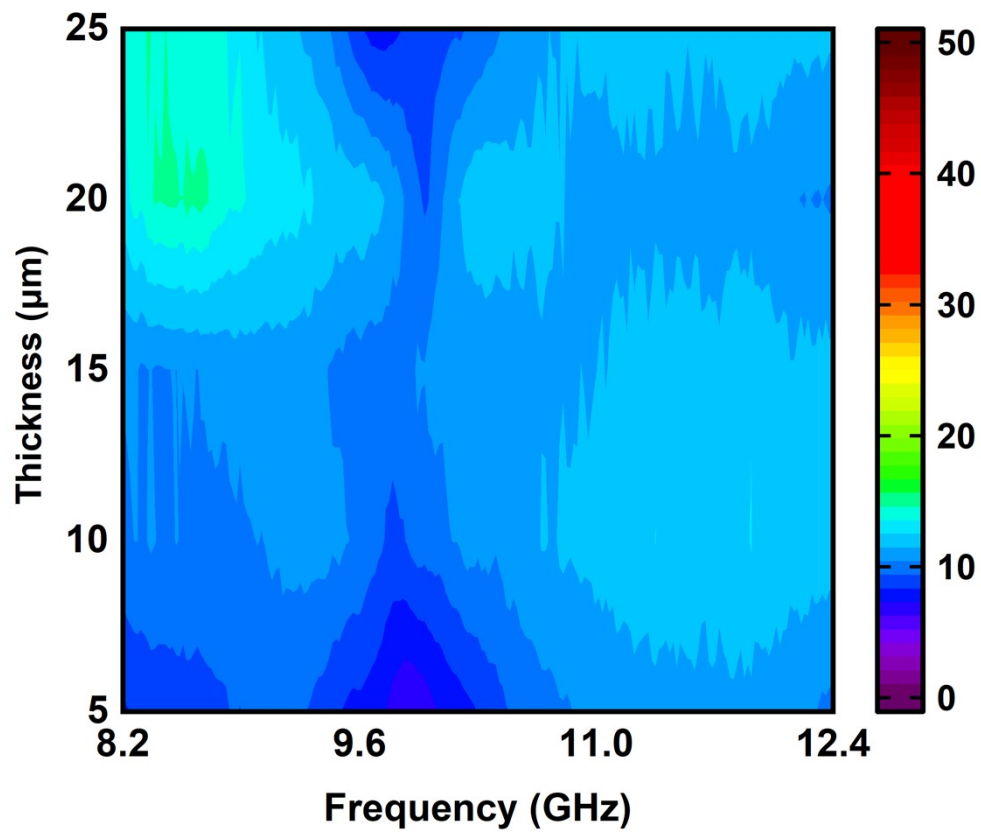

Figure S5. Plot of the  $SE_r$  of the films based on yolk-shell PNIPAM@void@PS@Ti<sub>3</sub>C<sub>2</sub>T<sub>x</sub> microspheres.
